# Supplementary material for: Electrical properties of disordered films of van der Waals semiconductor WS2 on paper
Source: Royal Society of Chemistry journal article supplement (doi:10.1039/d3nr06535a), 2024-01-01
Supplement: d3nr06535a2.pdf [file d3nr06535a2.pdf]

# 1 Supplementary Information: Electrical properties of disordered films of 2 van der Waals semiconductor WS<sub>2</sub> on paper

3

4 Fatima Zahra Kharchich<sup>1,2</sup>, Andres Castellanos-Gomez<sup>3</sup> and Riccardo Frisenda<sup>1,\*</sup>

5 <sup>1</sup> Physics Department, Sapienza University of Rome, Piazzale Aldo Moro 5, 00185 Rome, Italy

6 <sup>2</sup> Physics Department, Abdelmalek Essaadi University, M'haneche II, 93002 Tetouan, Morocco

7 <sup>3</sup> Materials Science Factory, Instituto de Ciencia de Materiales de Madrid (ICMM-CSIC), Madrid E-28049, Spain

8

9 \*E-mail: [riccardo.frisenda@uniroma1.it](mailto:riccardo.frisenda@uniroma1.it)

10

11

## 12 Table of contents

13 The supplementary information contains a video about the film deposition and a section about the random resistor  
14 network model.

15

## 16 Resistors network solver

17 Fig. S1 show four different resistor networks generated as artificial Brownian surfaces through synthetic surface  
18 generator in Gwyddion 2.64 with different Hurst exponents and stationarity scale to control the amount of high  
19 (spatial) frequency noise.

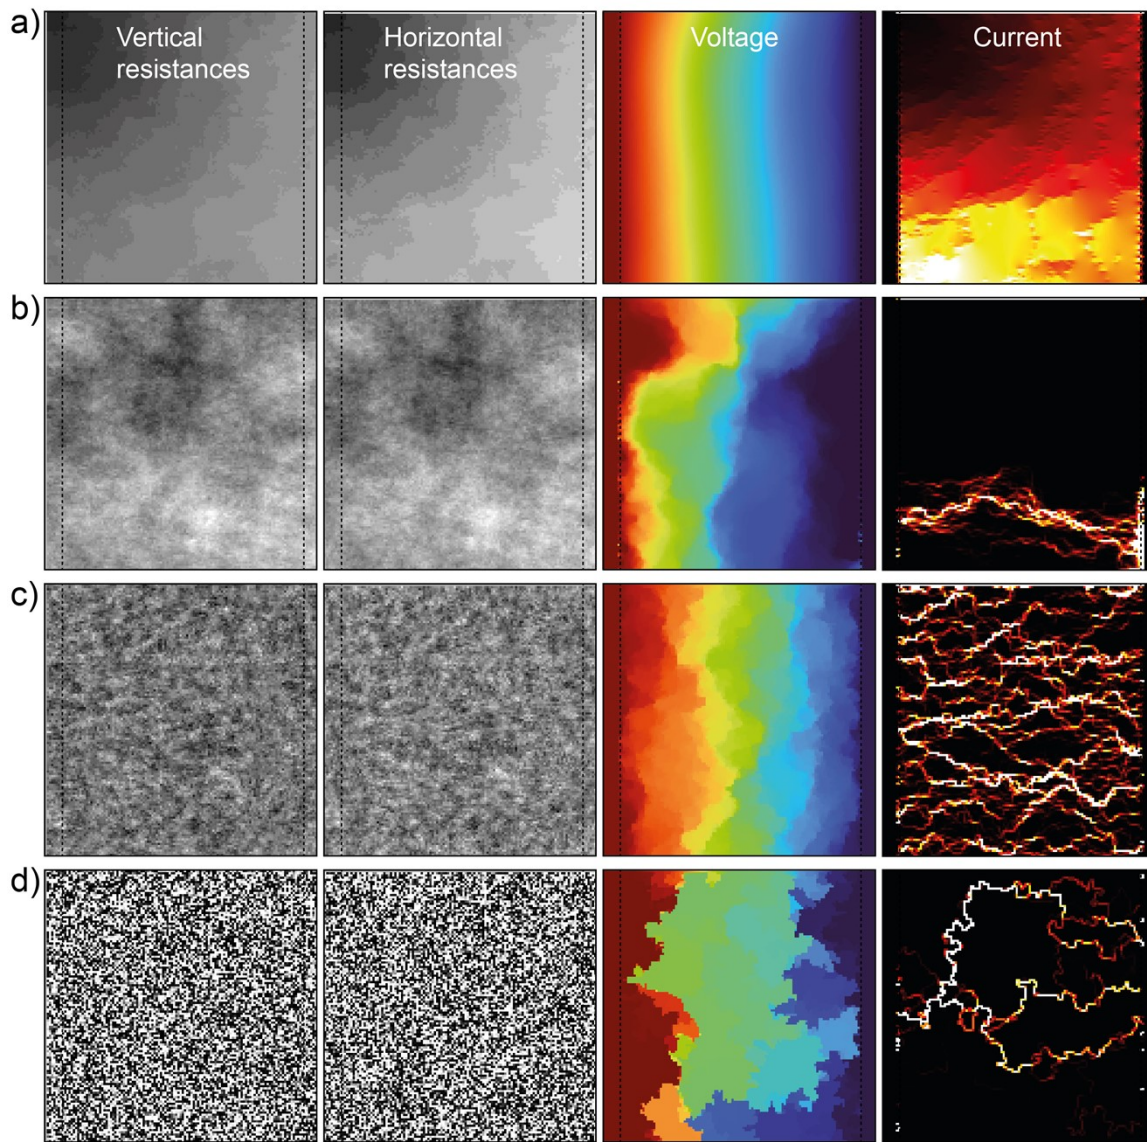

20

21 **Figure S1: Additional random resistance networks model.** a) First and second column: RRN composed of 120x120 resistors, respectively  
 22 vertically aligned resistors (left) and horizontally aligned ones (right). Black corresponds to higher resistance values and white to lower ones.  
 23 Third column: calculated voltage across the RRN with boundary conditions  $V=1$  V on the far-left side (in red) and  $V=0$  V on the far-right  
 24 side (in blue). Fourth column: current density calculated from the resistance and voltage maps. b-d) Same as panel (a) but for increasing high  
 25 frequency random noise in the resistors networks (high frequency noise increases from top to bottom).

26
